# Supplementary material
Source: PubMed Central journal article supplement (PMC6355588)
Supplement: 7a52a13474a6e4ab991d370261d3a2ad_AAC.02040-18-s0001.pdf [file 7a52a13474a6e4ab991d370261d3a2ad_AAC.02040-18-s0001.pdf]

1 Supplementary Figure and Table Legends

S1

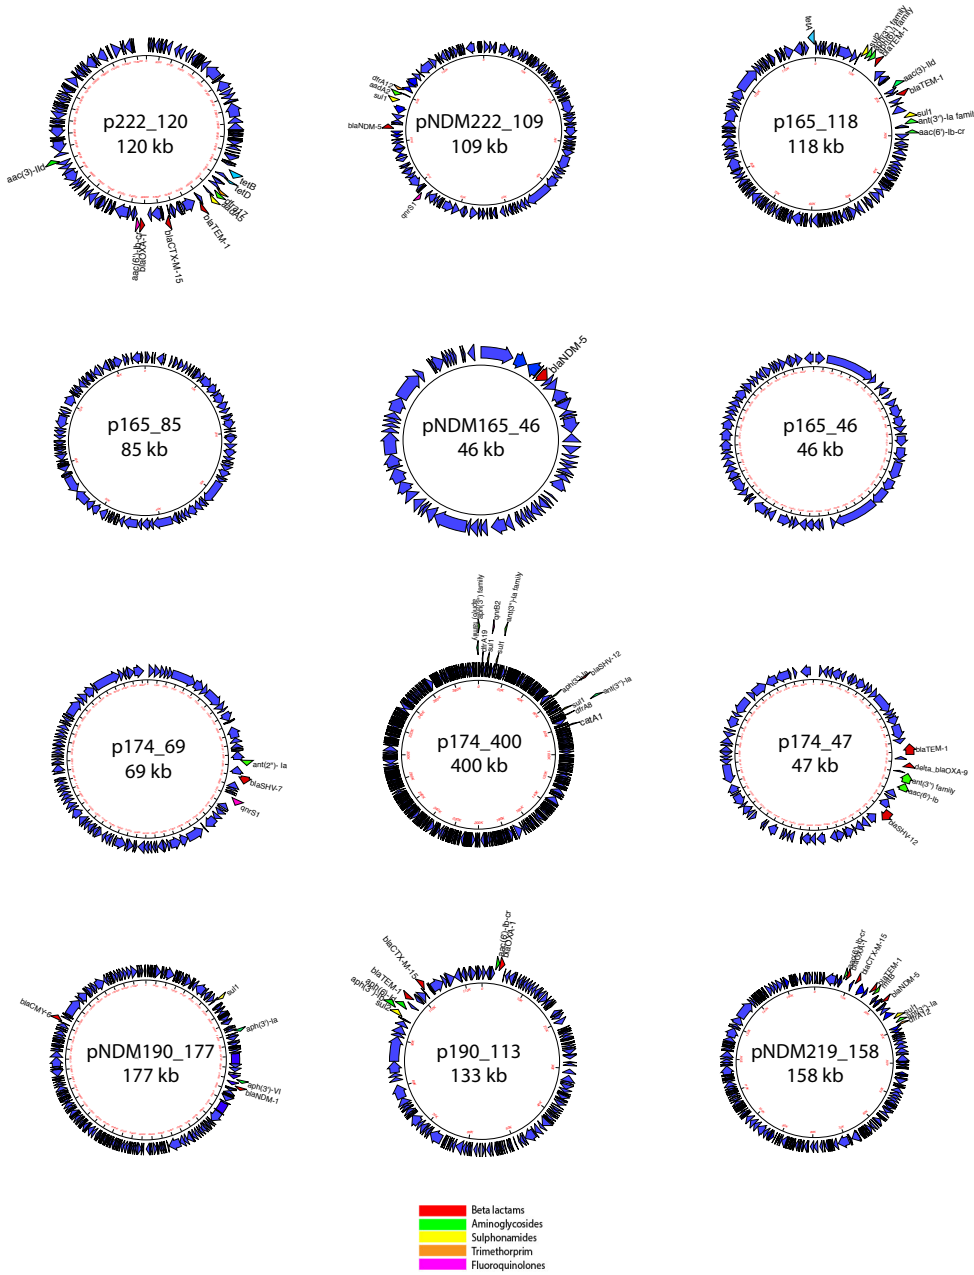

2

3 **Figure S1) Plasmid Analyses:** Maps of all plasmids found in the *bla*<sub>NDM</sub>-carrying strains, with resistance genes

4 highlighted and color-coded according to drug class. Supplementary Table 3 indicates incompatibility (Inc) group

5 and the closest homologue of each plasmid found in Genbank, along with the corresponding %identity/% query  
 6 length, host bacterium species, and origin.

7  
 8 **Supplementary Table 1: Strain and Sequence Dataset Identifiers**

| Strain ID | Crimson ID | BioProject ID | BioSample ID | Accession Number of Illumina DNA-seq reads | Location/Vector Name | Accession Number for PacBio Assembly |
|-----------|------------|---------------|--------------|--------------------------------------------|----------------------|--------------------------------------|
| ECO-165   | 0055-8761  | PRJNA278886   | SAMN04393397 | SRR3095381                                 | chromosome           | CP020509                             |
|           |            |               |              |                                            | p165_118             | CP020510                             |
|           |            |               |              |                                            | p165_85              | CP020511                             |
|           |            |               |              |                                            | pNDM165_46           | CP020512                             |
| ECC-174   | 0056-2175  | PRJNA278886   | SAMN04456586 | SRR3168645                                 | chromosome           | CP020528                             |
| ECO-190   | 0057-1694  | PRJNA278886   | SAMN04622917 | SRR3618626                                 | p174_400             | CP020529                             |
|           |            |               |              |                                            | p174_69              | CP020530                             |
|           |            |               |              |                                            | p174_47              | CP020531                             |
|           |            |               |              |                                            | chromosome           | CP020520                             |
| ECO-219   | 0058-7850  | PRJNA278886   | SAMN05194389 | SRR3615372                                 | pNDM190_177          | CP020524                             |
|           |            |               |              |                                            | p190_113             | CP020523                             |
|           |            |               |              |                                            | 190_phage1_95kb      | CP020522                             |
|           |            |               |              |                                            | 190_phage2_13kb      | CP020521                             |
| ECO-222   | 0059-2033  | PRJNA278886   | SAMN05194390 | SRR3615373                                 | chromosome           | CP020514                             |
|           |            |               |              |                                            | pNDM219_158          | CP020515                             |
| ECO-222   | 0059-2033  | PRJNA278886   | SAMN05194390 | SRR3615373                                 | chromosome           | CP020516                             |
|           |            |               |              |                                            | p222_120             | CP020519                             |
|           |            |               |              |                                            | 222_phage_48kb       | CP020518                             |
|           |            |               |              |                                            | pNDM222_109          | CP020517                             |

9  
 10

11 **Supplementary Table 2: PCR and Sequencing Primers used in Analyses**

| Primer Target                                          | Sequence                                                          | Target Size |
|--------------------------------------------------------|-------------------------------------------------------------------|-------------|
| NDM<br>(NDM)                                           | FW: CCAATATTATGCACCCGGTCGCGAAGCT<br>RV: CCATGCGGGCCGTATGAGTGATTGC | 798 bp      |
| p222<br>(IncF conjugative transfer protein TraR)       | FW: TTTCCATCTGGCCCCTAACC<br>RV: ACCCTTTCCCGGCCATAAAG              | 458 bp      |
| p165<br>(IncQ plasmid transfer nicking DNA)            | FW: CCACACGTGCATGTCGTTTT<br>RV: TGTTTTCTCCACGCCCTTGT              | 315 bp      |
| p219<br>(IncF pilus TraC)                              | FW: GACGCAAAAATGGTGGTGCT<br>RV: CTGCAGCAGGAAGGAACTGA              | 462 bp      |
| p190<br>(Chromosome plasmid partitioning protein ParA) | FW: ATGCACTCTGGCCGATGAAA<br>RV: CTGCGGTTTTGGTTCCAGTG              | 577 bp      |
| J53 E. coli<br>(CRISPR-associated protein Cse1/CasA)   | FW: CATCGCGCCGTGGATAGATA<br>RV: TGGGGCCATAGCCCATTAAC              | 588 bp      |
| 5' transposon boundary<br>(Oxidoreductase-ISab125)     | FW: ACATCAGCGCCTTCACGAGCAT<br>RV: TCGCATGTGCCTTTTGCCAGG           | 9356 bp     |
| 5' transposon boundary sequencing                      | IS91: ACCGTTTGTGAGTGGGCG<br>IS26: TATTGAGGTGATGCGTGC              | N/A         |
| 3' transposon boundary<br>(Integron-IS26)              | FW: AACTGCGGGTCAAGGATCTG<br>RV: ACTCCACGATTTACCGCTGG              | 1041 bp     |

12

13

14

15

16

17

18

19 **Supplementary Table 3: Incompatibility (Inc) group typings and identification of homologues for all plasmids**  
 20 **identified in NDM-carrying strains.**

| Carrying Strain | Plasmid     | Inc Type      | Genbank accession | Closest homologue (Accession #) | % Identity/ % Query Length | Host bacterium of homologous plasmid       | Origin of homologous plasmid |
|-----------------|-------------|---------------|-------------------|---------------------------------|----------------------------|--------------------------------------------|------------------------------|
| ECO-222         | P222_120    | IncFIB/FIA    | TBA               | pM105_mF (AP018137)             | 99/63                      | <i>Escherichia coli</i>                    | Myanmar (Human)              |
| ECO-222         | pNDM222_109 | IncFII        | TBA               | pCC1410-2 (KY288024)            | 99/76                      | <i>Klebsiella pneumoniae</i>               | South Korea (Human)          |
| ECO-165         | p165_118    | IncFII/IncF1B | TBA               | pSCKLB138-1 (MH161192.1)        | 99/95                      | <i>Klebsiella pneumoniae</i>               | China (unknown)              |
| ECO-165         | p165_85     | IncL1         | TBA               | pEC014 (MG545910)               | 98/86                      | <i>Escherichia coli</i>                    | China (Chicken)              |
| ECO-165         | pNDM165_46  | IncX          | TBA               | pSCM96-2 (CP028718.1)           | 99/100                     | <i>Klebsiella pneumoniae</i>               | China (Human)                |
| ECO-165         | P165_46     | IncC          | TBA               | p846 (CP029249.1)               | 99/99                      | <i>Salmonella enterica</i> subsp. enterica | Chine (Human)                |
| ECC-174         | P174_69     | IncL/M        | TBA               | pKPN1705-3 (CP022826.1)         | 99/100                     | <i>Klebsiella quasivariicola</i>           | USA (Human)                  |
| ECC-174         | P174_400    | IncH2/A       | TBA               | pKPC-272 (CP008825.1)           | 99/66                      | <i>Enterobacter sp.</i>                    | USA (Sink Drain)             |
| ECC-174         | P174_47     | IncR          | TBA               | pKP-Goe-641-1 (CP018737.1)      | 100/89                     | <i>Klebsiella pneumoniae</i>               | Germany (Human)              |
| ECO-190         | pNDM190_177 | IncC1         | TBA               | unitig_2 (CP021536.1)           | 99/74                      | <i>Escherichia coli</i>                    | USA (Human)                  |
| ECO-190         | P190_113    | IncFII        | TBA               | pKDO1 (JX424423.1)              | 99/99                      | <i>Klebsiella pneumoniae</i>               | Czech Republic (Human)       |
| ECO-219         | pNDM219_158 | IncFII        | TBA               | P123 (CP023378.1)               | 99/68                      | <i>Escherichia coli</i>                    | Scotland (Canine)            |

21

22
